# Supplementary material
Source: PubMed Central journal article supplement (PMC3490196)

Table S1, related to Figure 2. Summary of viruses identified in rhesus macaques at the NEPRC.

| Virus family     | Virus name <sup>1</sup> | Name of most closely related virus <sup>2</sup> | Percent identity nt or aa <sup>3</sup> (length, nt or aa) | Animal(s) in which viruses were detected <sup>4</sup> |                                                                         |          |            |
|------------------|-------------------------|-------------------------------------------------|-----------------------------------------------------------|-------------------------------------------------------|-------------------------------------------------------------------------|----------|------------|
|                  |                         |                                                 |                                                           | 24 weeks                                              |                                                                         | 64 weeks |            |
|                  |                         |                                                 |                                                           | SIV -                                                 | SIV +                                                                   | SIV -    | SIV +      |
| Adenoviridae     | WUHARV Adenovirus 1     | Simian adenovirus 1 ATCC VR-195                 | 79-99% nt                                                 | -                                                     | <u>40</u> <sup>5*</sup>                                                 | -        | 23         |
|                  | WUHARV Adenovirus 2     | Human adenovirus G                              | 36-100% nt                                                | -                                                     | <u>44</u> <sup>*</sup>                                                  | -        | -          |
|                  | WUHARV Adenovirus 3     | Human adenovirus G                              | 36-100% nt                                                | -                                                     | <u>44</u> <sup>*</sup>                                                  | -        | -          |
|                  | WUHARV Adenovirus 4     | Human adenovirus G                              | 87-93% nt                                                 | -                                                     | <u>30</u>                                                               | -        | -          |
|                  | WUHARV Adenovirus 5     | Human adenovirus G                              | 48-100% nt                                                | -                                                     | -                                                                       | -        | 27         |
| Caliciviridae    | WUHARV Calicivirus 1    | Tulane virus                                    | 75% nt (4839/6489)                                        | -                                                     | 25, 26, 31, 33, 34*, 35*, 37, 38, <u>39</u> <sup>*</sup> , 40*, 41, 44* | -        | 23, 25     |
|                  | WUHARV Calicivirus 2    | Tulane virus                                    | 88-93% nt (4463/5082, 753/812)                            | -                                                     | 37                                                                      | -        | 30, 37, 41 |
|                  | WUHARV Calicivirus 3    | Rhesus macaque recovirus strain FT437           | 0-81% nt (50/64, 288/413, 216/268)                        | -                                                     | 23, 28*, 32, <u>39</u> <sup>*</sup>                                     | -        | -          |
| Papillomaviridae | WUHARV Papillomavirus 1 | Human papillomavirus                            | 69% nt (300/432)                                          | 15                                                    | 25                                                                      | -        | 32         |
| Parvoviridae     | WUHARV Bocavirus 1      | Human bocavirus isolate KU3                     | 73% nt (118/160)                                          | -                                                     | -                                                                       | -        | <u>29</u>  |
|                  | WUHARV Dependovirus 1   | Adeno-associated virus 11                       | 93% nt (3812/4090)                                        | -                                                     | <u>40</u> <sup>*</sup>                                                  | -        | 29         |
|                  | WUHARV Dependovirus 2   | Adeno-associated virus 10                       | 92% nt (3680/4020)                                        | -                                                     | 23, 30, 31, 32, 34*, 38, <u>39</u> <sup>*</sup> , 40*, 44*              | -        | 27, 29     |
|                  | WUHARV Dependovirus 3   | Adeno-associated virus isolate rh.31            | 94% nt (1680/1793)                                        | -                                                     | <u>40</u> <sup>*</sup>                                                  | -        | -          |
|                  | WUHARV Dependovirus 4   | Adeno-associated virus isolate rh.8R            | 86% nt (988/1145)                                         | -                                                     | 37, <u>40</u> <sup>*</sup>                                              | -        | -          |
|                  | WUHARV Dependovirus 5   | Adeno-associated virus 7                        | 86% nt (264/307)                                          | -                                                     | <u>26</u>                                                               | -        | -          |
|                  | WUHARV Parvovirus 1     | Bufovirus 2                                     | 77% nt (1626/2111)                                        | 7                                                     | 24*, 31, 33, 38, <u>39</u> <sup>*</sup>                                 | -        | 25, 37     |
|                  | WUHARV Parvovirus 2     | Bufovirus 2                                     | 75-79% nt (522/698, 139/175)                              | -                                                     | <u>35</u> <sup>*</sup>                                                  | -        | 27         |

|                         |                            |                                        |                       |                     |                                                                      |                         |                                                 |
|-------------------------|----------------------------|----------------------------------------|-----------------------|---------------------|----------------------------------------------------------------------|-------------------------|-------------------------------------------------|
| <b>Picobirnaviridae</b> | WUHARV<br>Picobirnavirus 1 | Human<br>picobirnavirus                | 26% aa<br>(147/574)   | -                   | <u>26</u> , 36*                                                      | -                       | -                                               |
|                         | WUHARV<br>Picobirnavirus 2 | Otarine<br>picobirnavirus              | 29% aa<br>(119/415)   | 14,<br><u>17</u>    | -                                                                    | -                       | -                                               |
|                         | WUHARV<br>Picobirnavirus 3 | Human<br>picobirnavirus                | 29% aa<br>(102/354)   | 8, <u>15</u>        | -                                                                    | -                       | -                                               |
|                         | WUHARV<br>Picobirnavirus 4 | Human<br>picobirnavirus                | 36% aa (94/260)       | -                   | <u>27</u>                                                            | -                       | -                                               |
|                         | WUHARV<br>Picobirnavirus 5 | Human<br>picobirnavirus                | 34% aa (63/187)       | <u>22</u>           | 37                                                                   | -                       | -                                               |
|                         | WUHARV<br>Picobirnavirus 6 | Human<br>picobirnavirus                | 37% aa (55/149)       | -                   | <u>36</u> *                                                          | -                       | -                                               |
|                         | WUHARV<br>Picobirnavirus 7 | Human<br>picobirnavirus                | 33% aa<br>(101/302)   | -                   | <u>27</u>                                                            | -                       | -                                               |
| <b>Picornaviridae</b>   | WUHARV<br>Enterovirus 1    | Human enterovirus<br>92 strain RJG7    | 86% nt<br>(6228/7268) | -                   | <u>41</u> , 44*                                                      | -                       | -                                               |
|                         | WUHARV<br>Enterovirus 2    | Simian enterovirus<br>SV19 strain M19s | 83% nt<br>(5879/7100) | -                   | 23, 25, 26,<br>27, 29, 31,<br>35*, 38, <u>39</u> *                   | -                       | 25, 29,<br>30, 32,<br>33, 38, 41                |
|                         | WUHARV<br>Enterovirus 3    | Simian enterovirus<br>SV19 strain M19s | 84% nt<br>(5854/6961) | -                   | -                                                                    | -                       | 25, 26,<br>27, 29,<br>30, <u>33</u> ,<br>37, 41 |
|                         | WUHARV<br>Picornavirus 1   | Simian picornavirus<br>6               | 85% nt (284/335)      | -                   | <u>26</u>                                                            | -                       | -                                               |
|                         | WUHARV<br>Sapelovirus 1    | Simian sapelovirus<br>1                | 81% nt<br>(6558/8087) | 19                  | 25, 26, 29,<br>30, 31, 32,<br>34*, 35*, 38,<br>39*, <u>42</u> *, 43* | 1, 11,<br>17,<br>19, 22 | 23, 25,<br>26, 30,<br>31, 32,<br>33, 37, 38     |
|                         | WUHARV<br>Sapelovirus 2    | Simian sapelovirus<br>1                | 81% nt<br>(6510/8076) | -                   | 25, 28*, 35*,<br>37, <u>41</u>                                       | -                       | 29, 41                                          |
| WUHARV<br>Sapelovirus 3 | Simian sapelovirus<br>1    | 79% nt<br>(5476/6919)                  | -                     | 23, <u>37</u> , 40* | -                                                                    | 27                      |                                                 |
| <b>Polyomaviridae</b>   | WUHARV<br>Polyomavirus 1   | Polyomavirus<br>HPyV6 isolate 601a     | 76% nt (242/318)      | -                   | -                                                                    | -                       | 29                                              |

<sup>1</sup> Viruses with 98% nt identity over the full length of aligned regions are the "same" virus.

<sup>2</sup> Most closely related viruses were identified as the top hit using a NCBI web-based BLAST search against the NCBI nr database on 8/31/2012.

<sup>3</sup> Percent aa identity is reported for viruses for which no known virus had nt identity.

<sup>4</sup> As determined by 454 sequencing.

<sup>5</sup> Underlined numbers indicate animals from which virus contigs were assembled.

\* Euthanized for progressive AIDS 24 to 64 weeks after SIV infection.

Table S2, related to Figure 3. Primers used for PCR screen.

| WUHARV Virus      | Primer name | Targeted region                      | Sequence (5'-3')         | Orientation |
|-------------------|-------------|--------------------------------------|--------------------------|-------------|
| Adenovirus 1      | 4302c3f     | Hexon                                | GGCAATCATGATGGACACCTT    | F           |
| Adenovirus 1      | 4302c3r     | Hexon                                | TTAATCACCACCGCAACGC      | R           |
| Adenovirus 1      | 4302c1f     | Hexon                                | CAATGGAACATTAATCCCACG    | F           |
| Adenovirus 1      | 4302c1r     | Hexon                                | CCTGCCAACACTCCCATATTT    | R           |
| Adenovirus 1      | 4302c18f    | E1B                                  | AGAGCTATCACACAGCGTTCA    | F           |
| Adenovirus 1      | 4302c18r    | E1B                                  | ACCGAGTGGTGGAGGAGAA      | R           |
| Adenovirus 2      | 4310ac18f   | pIIIa                                | TAACGTTCCAGACCAATCTGGA   | F           |
| Adenovirus 2      | 4310ac18r   | pIIIa                                | CGGCAATAGTGCTACTGTTGG    | R           |
| Adenovirus 2      | 4310ac16f   | Hexon                                | CGGGACAACCTTCATTGGACT    | F           |
| Adenovirus 2      | 4310ac16r   | Hexon                                | GCGCCAATGTTTACAAAGGT     | R           |
| Adenovirus 3      | 4310bc18f   | pIIIa                                | TAACGTTCCAGACCAATCTGGA   | F           |
| Adenovirus 3      | 4310bc18r   | pIIIa                                | CGGCAATAGTGCTACTGTTGG    | R           |
| Adenovirus 3      | 4310bc21f   | Hexon                                | ACGACAGCACCAGTTCAAAAC    | F           |
| Adenovirus 3      | 4310bc21r   | Hexon                                | TTTTCTGGCAGCGTGATGTT     | R           |
| Adenovirus 3      | 4310bc28r   | E3                                   | CTCTTGGCAACCCCTTATTG     | F           |
| Adenovirus 3      | 4310bc28f   | E3                                   | TGGGTGAAACCATTCTGTT      | R           |
| Adenovirus 4      | 4312u11r    | E3                                   | CCGTCCTCTCCTGGTAGAAA     | F           |
| Adenovirus 4      | 4312u11f    | E3                                   | CGTCGACTGTTGGAGAAACA     | R           |
| Adenovirus 4      | 4312u10r    | DBP                                  | GCCGTTACATCCAGATCCTC     | F           |
| Adenovirus 4      | 4312u10f    | DBP                                  | TACACCGAGGGAATGAAAGC     | R           |
| Adenovirus 4      | 4312u7r     | NCR <sup>1</sup> between E1a and E1b | CTTGTGCCTGTGCTTTTCAT     | F           |
| Adenovirus 4      | 4312u7f     | NCR between E1a and E1b              | GTGCAAAGAGAAGTATGTTG     | R           |
| Adenovirus 5      | 4287u7f     | Iva                                  | GGATGTTCAAGTACATGGGCA    | F           |
| Adenovirus 5      | 4287u7r     | Iva                                  | GATGCATGACAAGTTCCCCAA    | R           |
| Adenovirus 5      | 4287c5f     | E3                                   | GAATGGTAGCTGCTTTCTTCA    | F           |
| Adenovirus 5      | 4287c5r     | E3                                   | TGTTGGGTGATTGTGATGGA     | R           |
| Adenovirus 5      | 4287c11f    | Fiber-1                              | CTGAAAAAACGAATTGGTGG     | F           |
| Adenovirus 5      | 4287c11r    | Fiber-1                              | TTGACAACAATGGTGCGTTG     | R           |
| Adenovirus (1-5)  | AdV-a       | pIIIa                                | ACTAACGKACAGACCAATCTGG   | F           |
| Adenovirus (1-5)  | AdV-b       | pIIIa                                | GTACAGRCTCACGGACTGC      | R           |
| Calicivirus (1-2) | CV-a        | NS <sup>2</sup> polyprotein          | GTACGAYGTCGGAGGGACC      | F           |
| Calicivirus (1-2) | CV-b        | NS polyprotein                       | GRTCACAAGCCATGACACTCAG   | R           |
| Calicivirus 3     | CV-c        | NS polyprotein                       | TTATGTTATGGACAACCCAAAGG  | F           |
| Calicivirus 3     | CV-d        | NS polyprotein                       | GGTCAAGAGACAATAGCTCCAT   | R           |
| Parvovirus (1-3)  | PV-a        | capsid                               | ACCAGACTAACWCAAGGCGC     | F           |
| Parvovirus (1-3)  | PV-b        | capsid                               | GGTASGTGTTCCATTGTCTTGG   | R           |
| Enterovirus (1-3) | EV-a        | 5' UTR <sup>3</sup>                  | GCACAACCCAGTGTAGTTC      | F           |
| Enterovirus (1-3) | EV-b        | 5' UTR                               | CCAATCCAATMGCTATATGATGAC | R           |
| Sapelovirus (1-3) | SV-a        | 5' UTR                               | CCAGKMTAAAAGGCAATTGTGG   | F           |
| Sapelovirus (1-3) | SV-b        | 5' UTR                               | CCTGTCCAGGTAGCACTAGACT   | R           |

<sup>1</sup> NCR = non-coding region<sup>2</sup> NS = non-structural<sup>3</sup> UTR = untranslated region

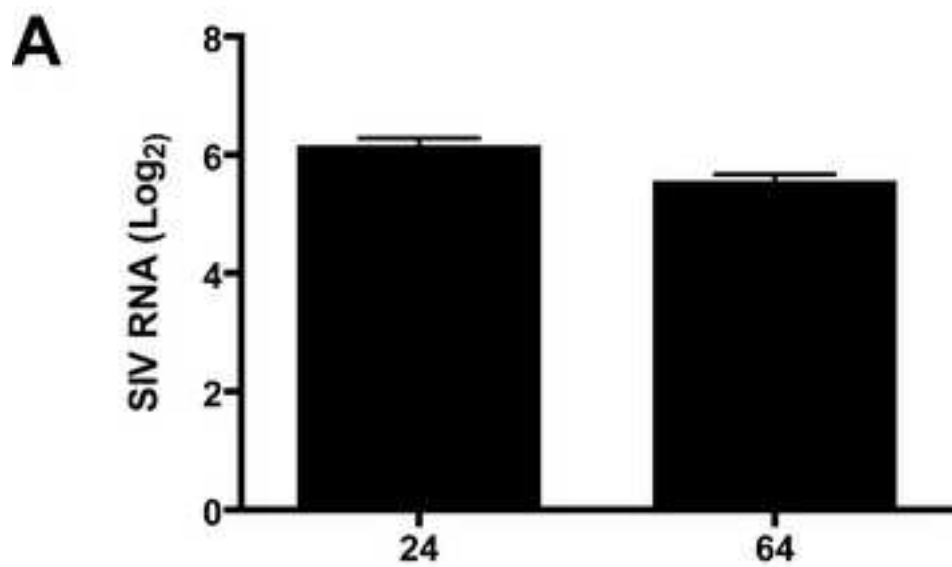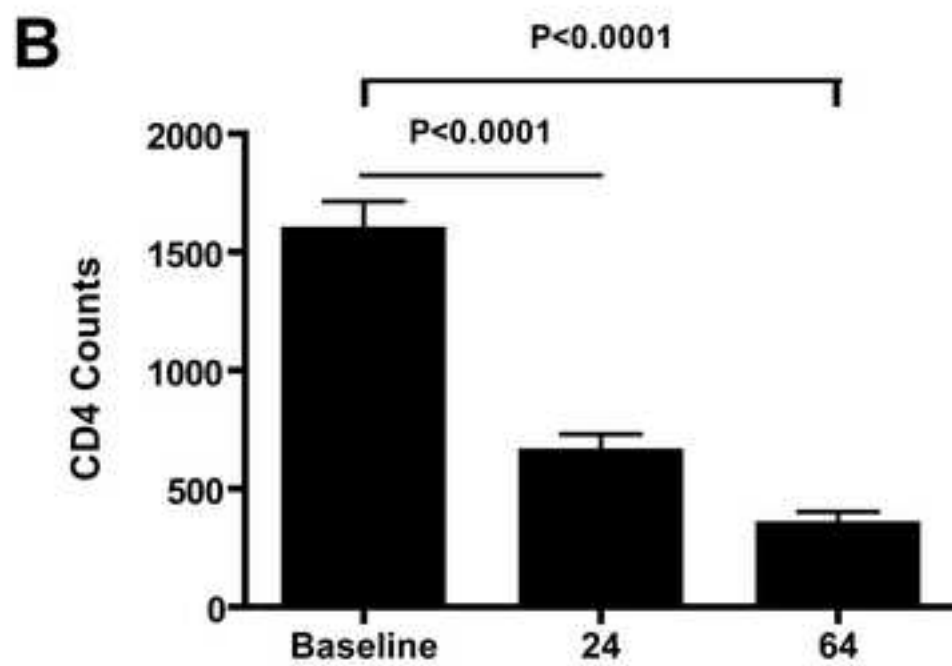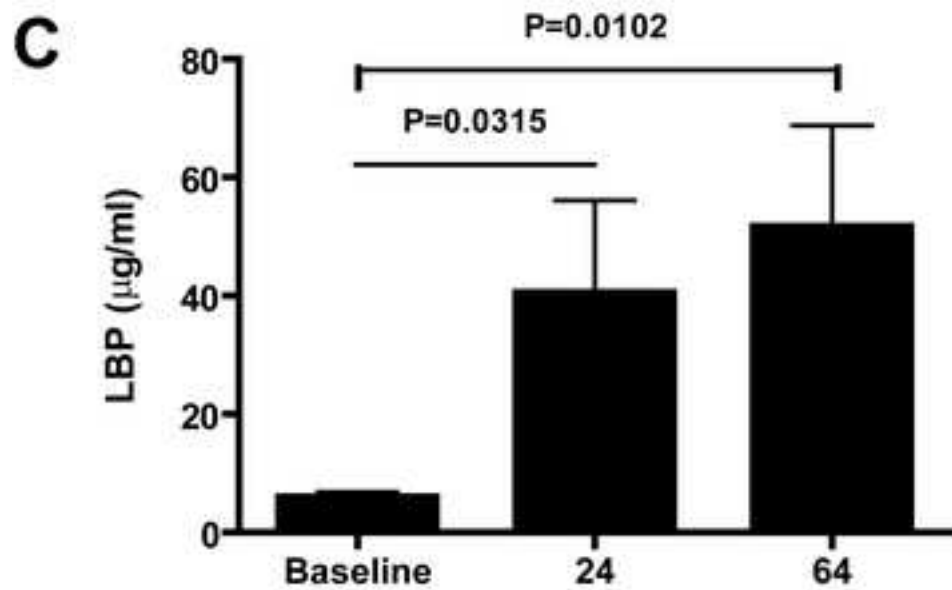

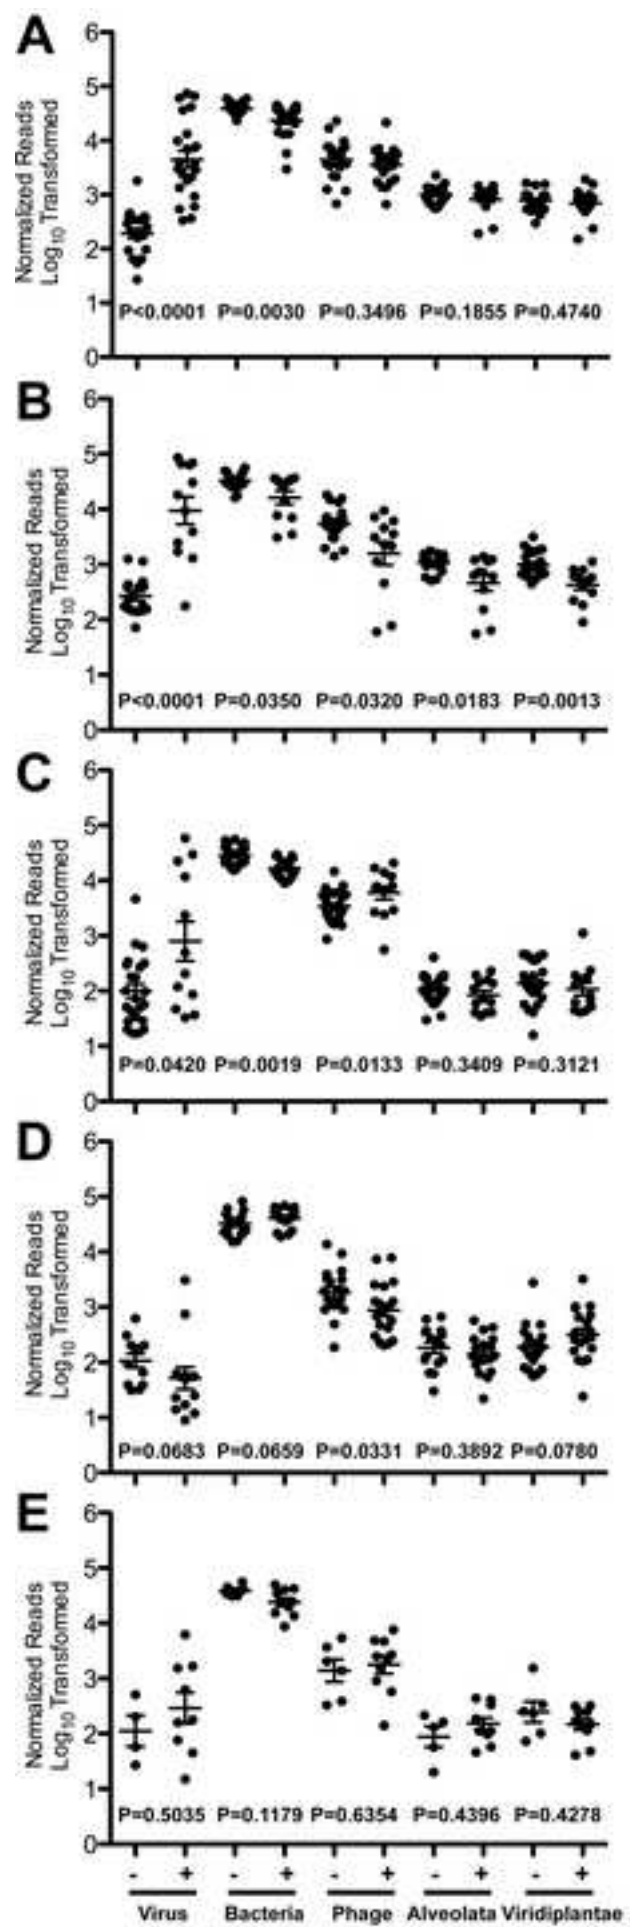

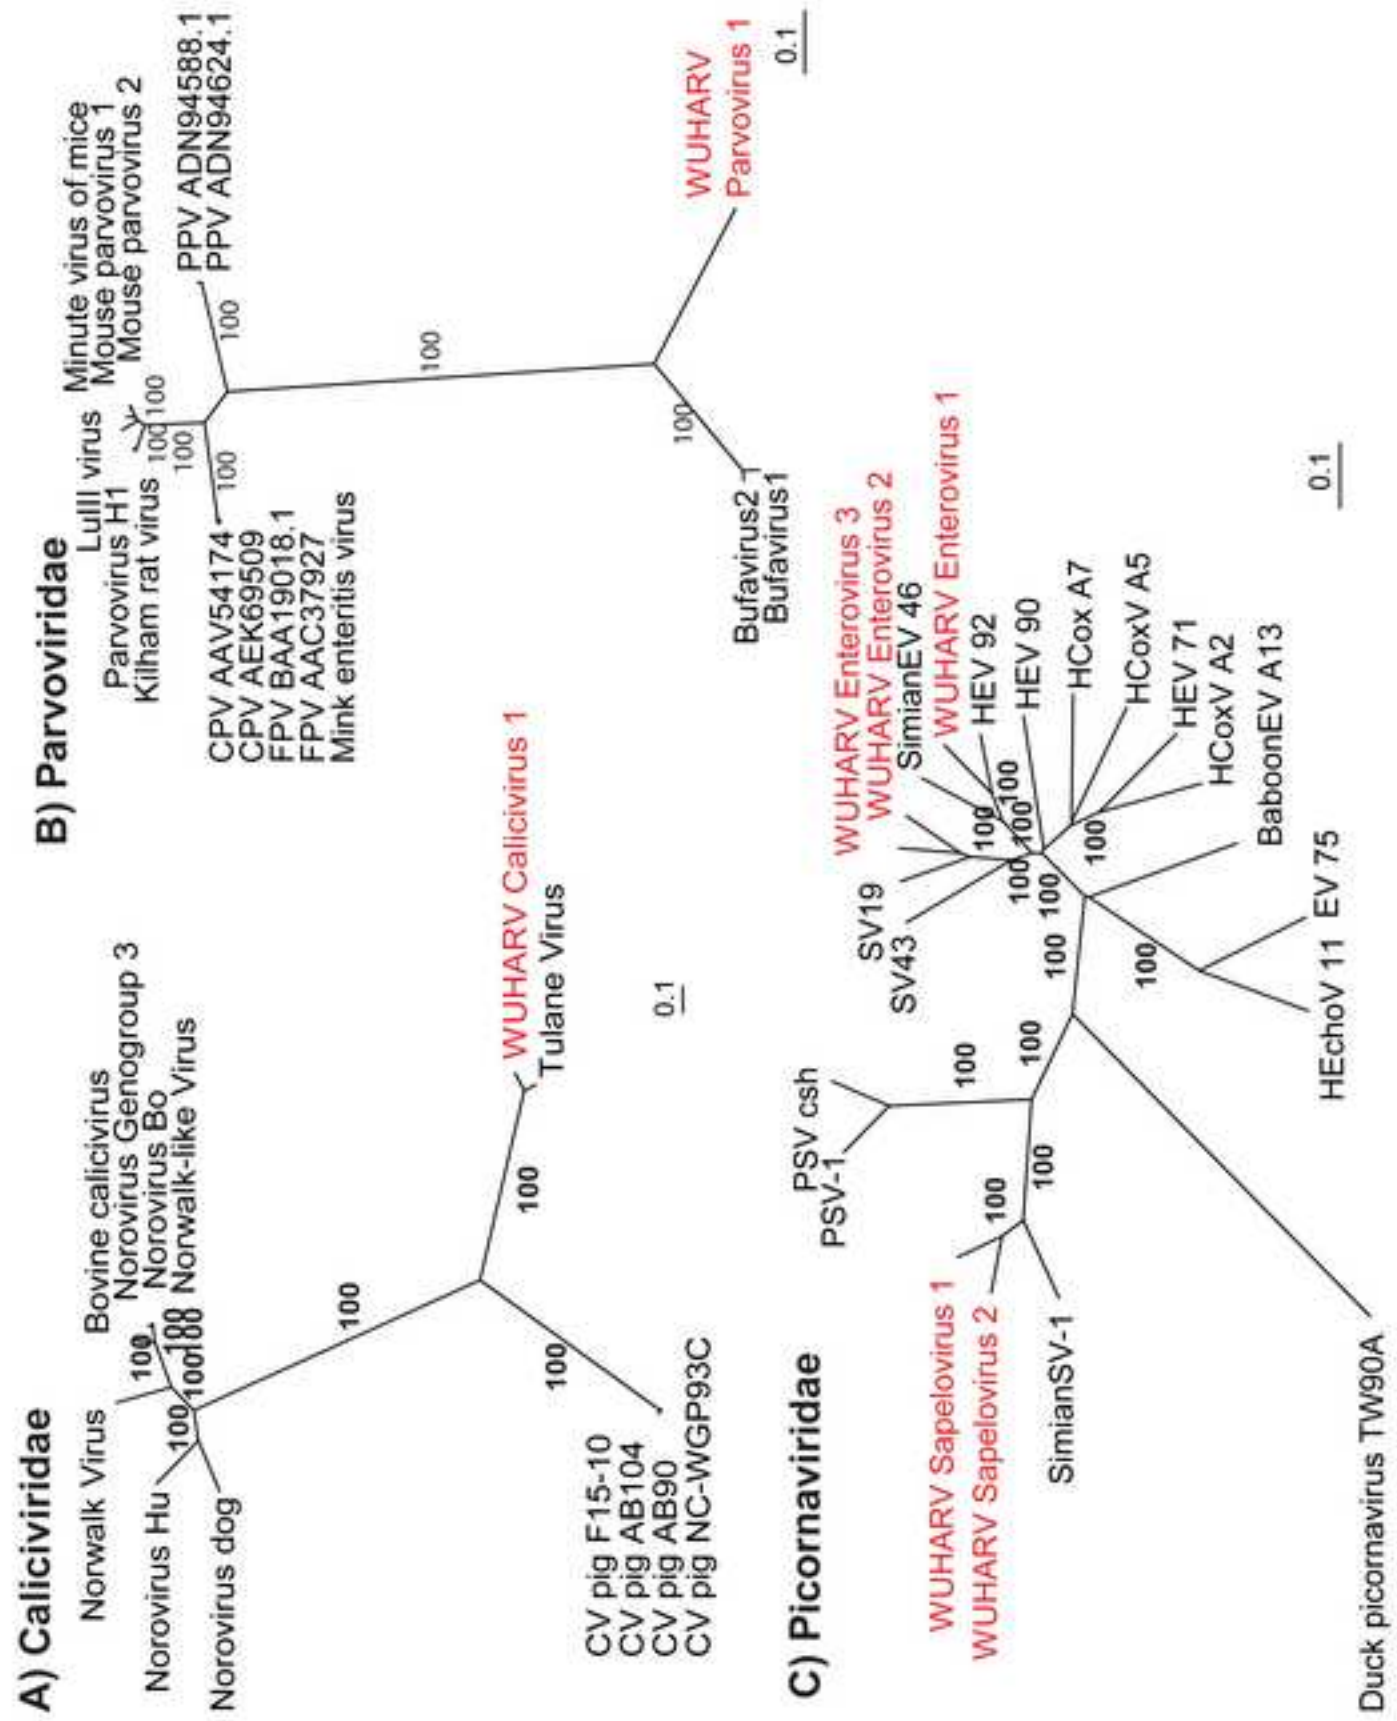

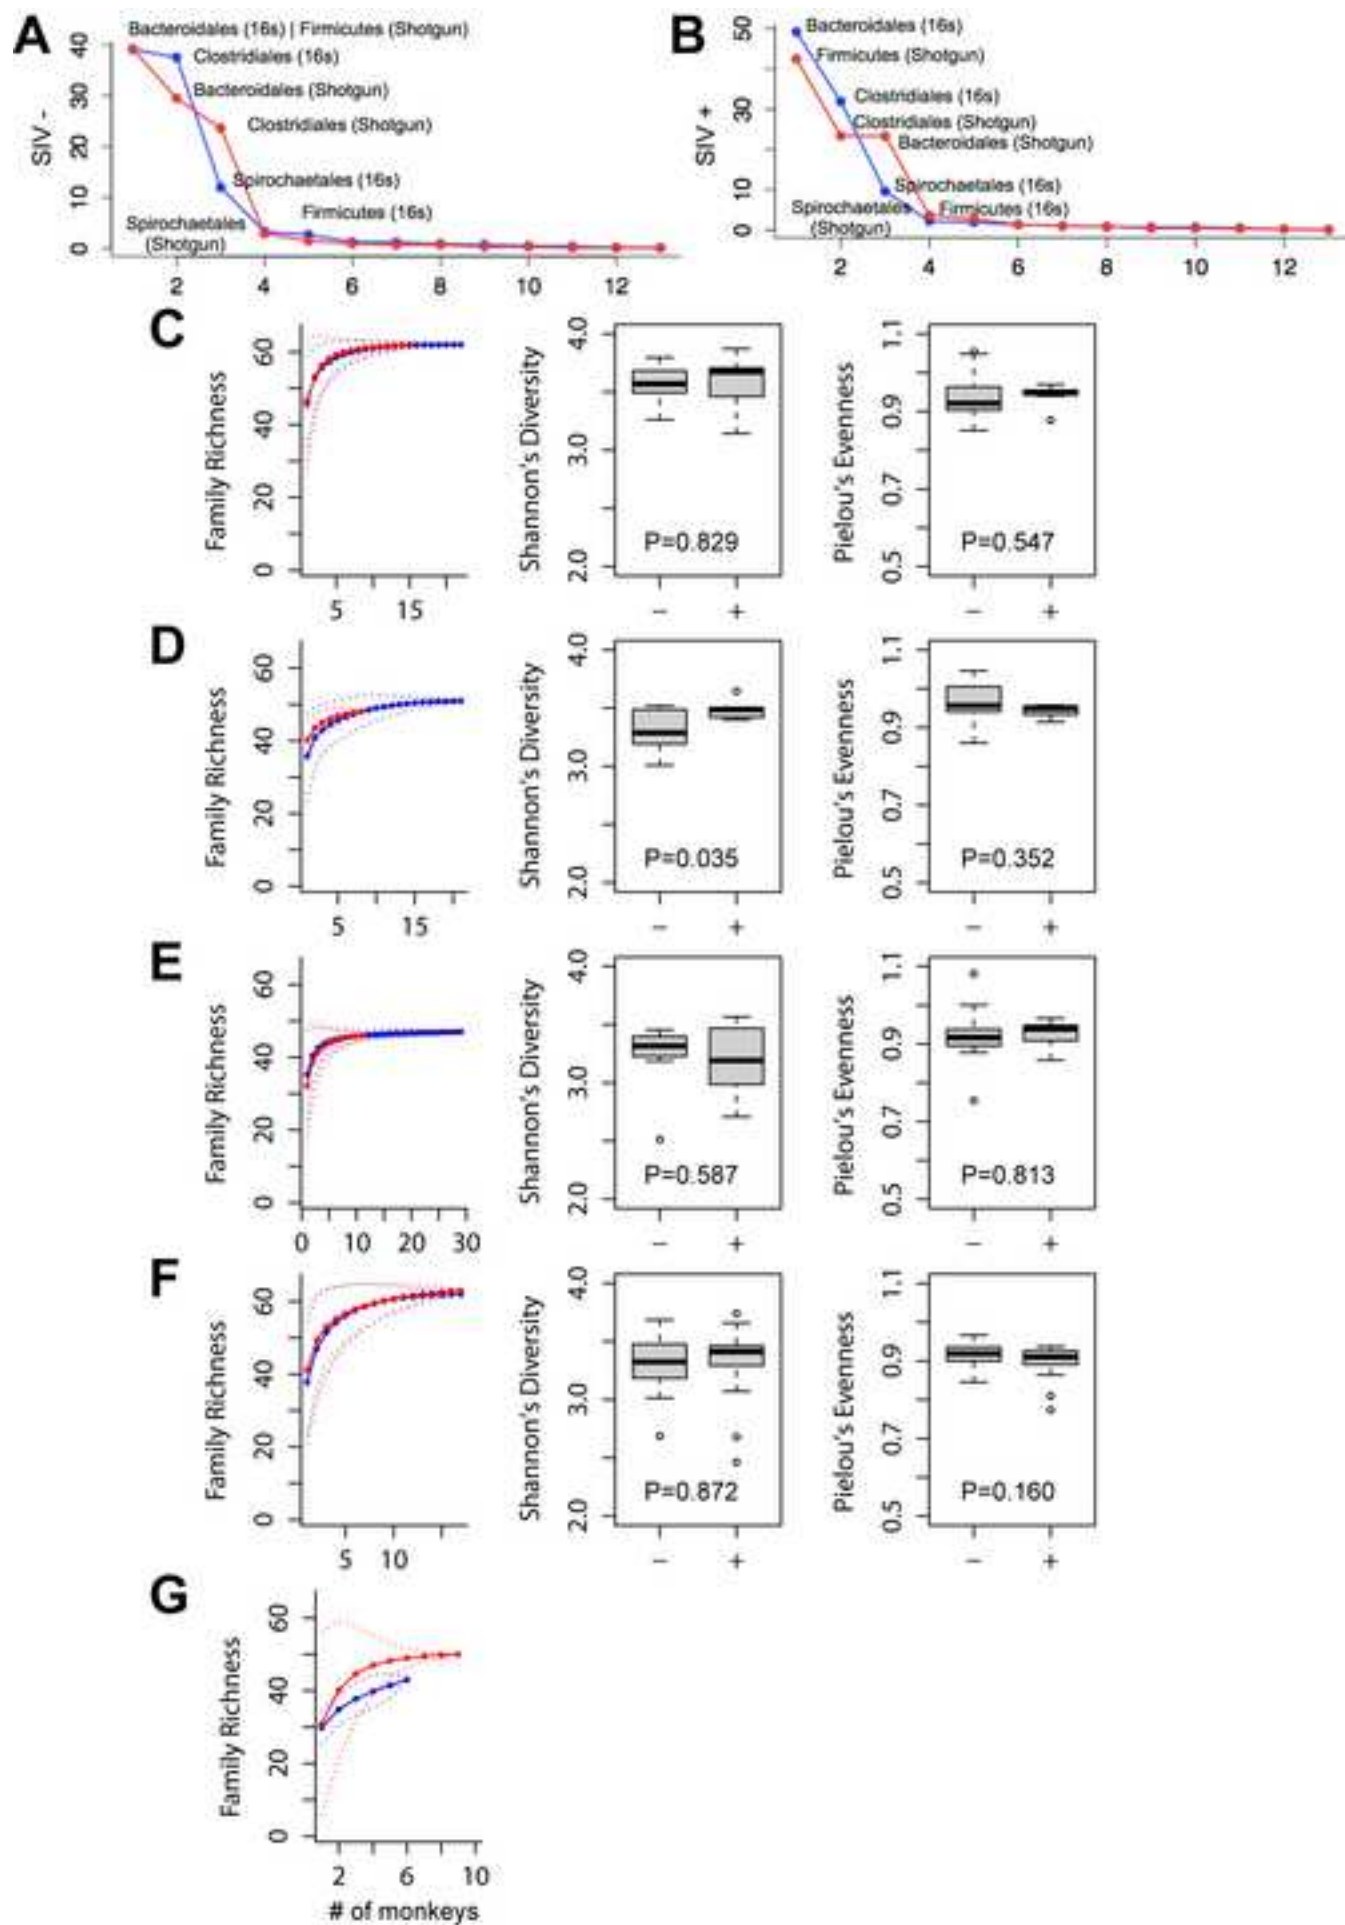

Supplement: NIHMS410128-supplement-02.pdf [file NIHMS410128-supplement-02.pdf]
